# Supplementary material
Source: publisher figshare collection journal article supplement (https://gsapubs.figshare.com/ndownloader/files/22757507)
Supplement: Supplementary file 1 [file 22757507]

GSA Data Repository item for Munroe et al., *Geology*, Latest Pleistocene advance of alpine glaciers in the southwestern Uinta Mountains, Utah, USA: Evidence for the influence of local moisture sources; cosmogenic dating methods, Table DR1 ( $^{10}\text{Be}$  data for Yellowstone canyon moraine boulders), Table DR2 ( $^{10}\text{Be}$  data for Lake Fork moraine boulders) and Table DR3 (Equilibrium Line Altitude Calculations).

## **COSMOGENIC DATING METHODS**

### *Field Sampling*

Terminal and/or lateral moraines in the Yellowstone and Lake Fork valleys were surveyed to identify 7 to 10 boulders most suitable for cosmogenic-exposure dating. Suitable boulders are those that have been exposed continuously at the moraine surface since they were deposited, with no prior exposure history, and have experienced little or no erosion of their surfaces. Boulders were selected primarily on the basis of position relative to the moraine crest, height, lithology, shape, weathering characteristics, and local geomorphology (e.g., Gosse and Phillips, 2001). For example, the tallest boulders (usually greater than 60 cm high) at the moraine crest composed of silica-cemented sandstone or quartzite with flat or gently rounded surfaces that did not appear to be eroded or mechanically broken were considered suitable (e.g., Gosse and Phillips, 2001). Effects of topographic shielding were considered negligible for all boulders because angles to the horizon were less than  $10^\circ$  in all directions. Boulder locations were determined with a hand-held GPS and the tops of boulders were sampled with a sledge hammer and chisel. Sample thicknesses were reduced prior to processing to 3 cm or less (production rates were later corrected for sample thickness using equations in Gosse and Phillips, 2001).

### *Laboratory Methods*

Laboratory methods used to isolate beryllium and aluminum in boulder samples are from Bierman et al. (2003), as adopted by Kaplan et al. (2004), Douglass et al. (2005), and Laabs (2004) and were undertaken at the UW-Madison Cosmogenic Nuclide Preparation Lab. These procedures are summarized here.

After field collection, samples were reexamined to determine quartz content and to reduce thickness as much as possible. Samples were crushed, pulverized and sieved to separate grains between 420 and 840  $\mu\text{m}$  in diameter. All sample compositions were >95% quartz and all non-quartz phases were easily removed. Quartz grains within the target size were etched in HCl, then in a dilute  $\text{HNO}_3/\text{HF}$  mixture to remove meteoric beryllium from grain surfaces (Kohl and Nishiizumi, 1992). Next, aliquots of the sample were dissolved and tested for purity by inductively-coupled plasma atomic-emission spectrometry (pure samples were identified by beryllium amounts below detection levels). Clean samples were spiked with approximately 500  $\mu\text{g}$   $^9\text{Be}$  and dissolved in a concentrated  $\text{HNO}_3/\text{HF}$  mixture and dried to metal fluorides. Fluorides were converted to chlorides by dissolving and drying in  $\text{HClO}_4$  and HCl. Samples were redissolved in HCl to begin separating a variety of cations from the sample, and ultimately beryllium and aluminum. This set of procedures involves the use of ion-exchange chromatography and selective precipitation to remove  $\text{Fe}^{2+}$ ,  $\text{Ca}^{2+}$ , and  $\text{Ti}^{4+}$ , and isolate  $\text{BeOH}_2$  and  $\text{AlOH}_3$ . The final sample of  $\text{BeOH}_2$  was oxidized, weighed and combined with Niobium binder (5:1 by mass) and sent to the Purdue Rare Isotope Measurement Lab (PRIME Lab) to be analyzed by accelerator mass spectrometry (AMS). This technique is used to measure the extremely low  $^{10}\text{Be}/^9\text{Be}$  in boulder samples. Because the amount of  $^9\text{Be}$  added to each sample is

known, the concentration of  $^{10}\text{Be}$  (in atoms  $\text{g}^{-1}$  quartz) can be calculated from this ratio and ultimately used to calculate the boulder-exposure age (see below).

### *Age Calculations and Uncertainties*

Boulder-exposure ages were calculated from measured  $^{10}\text{Be}$  concentrations using the age equation from Lal (1991) and scaling equations from Stone (2000). We do not account for erosion of the boulder surface; this effect is assumed to be negligible based on the resistant lithology of boulders and the presence of glacial polish and/or striae on all sampled boulder surfaces. If erosion rates are small (1 to 5 mm/kyr), it can be shown mathematically that this assumption is valid for samples that have been exposed for  $\sim 20,000$  years (e.g., Bierman et al., 1999).

The production rate is perhaps the greatest source of uncertainty in the cosmogenic-exposure age calculations; it increases exponentially with elevation and linearly with geomagnetic latitude (Gosse and Phillips, 2001) and, therefore, must be scaled to the location of each boulder. Many researchers have suggested that the uncertainty of scaled production rates is up to 20% (e.g., Desilets and Zreda, 2001). To minimize this uncertainty, we use a base  $^{10}\text{Be}$  production rate of  $5.1 \pm 0.3$  atoms  $\text{g SiO}_2^{-1} \text{yr}^{-1}$  ( $2\sigma$ ) determined by Stone (2000) from a calibration site with a similar age (20 ka), latitude and elevation as Smiths Fork-age moraines in the Uinta Mountains. This production rate is the same used by Licciardi et al. (2004), who reviewed the chronology of glacial deposits in the western U.S., many of which are based on  $^{10}\text{Be}$  cosmogenic-exposure dating (e.g., Gosse et al., 1995a, b; Licciardi et al., 2001; Benson et al., 2004b). We use scaling factors for elevation and geographic latitude in Stone (2000). For

reference, the  $^{10}\text{Be}$  production rate in boulders at 2500 m asl and at N40° latitude (the elevation and latitude of most moraine boulders in the southern Uintas) is  $30.8 \text{ atoms g SiO}_2^{-1} \text{ yr}^{-1}$ .

Despite the estimated uncertainty of scaled production rates, we consider only the analytical uncertainty of AMS measurements in calculating  $^{10}\text{Be}$  exposure-age uncertainties, at least for comparing exposure ages within the Uintas and from elsewhere in the central Rocky Mountains. Samples were measured against standards from NIST SRM 4325 (Sharma et al., 2000), which requires a 14% increase to measured  $^{10}\text{Be}/^9\text{Be}$  ratios (Middleton et al., 1993). The  $^{10}\text{Be}$  concentration in samples is determined by standard isotope dilution from the amount of spike added to each sample (see Tables DR1 and DR2) and corrected for concentrations of meteoric  $^{10}\text{Be}$  in measured blanks. Blank ratios ranged from 4.2 to  $23.2 \times 10^{-15}$  for three sample batches, which requires a blank correction of less than 1% for all individual samples. We conclude from this that laboratory contamination from meteoric  $^{10}\text{Be}$  is negligible for all samples.

For the Yellowstone and Lake Fork Canyon moraines, we report the  $2\sigma$  analytical uncertainty of individual boulder-exposure age estimates (Fig. 1, Tables DR1 and DR2) to ensure conservative identification of outliers and for comparison with other reported cosmogenic-age estimates in the Rocky Mountains (e.g., Licciardi et al., 2004; Benson et al., 2004a, b).

Other considerations for boulder-exposure age calculations include the effects of topographic shielding, sample thickness and snow cover on production rate. The former two effects can be easily estimated (Gosse and Phillips, 2001) and are considered constant for the period of boulder exposure (the Uintas have experienced minimal to no tectonic activity during

the past ~20 kyr and erosion is considered negligible). Production rates for all boulders were corrected for sample thickness using

$$Q_s = \frac{A_f}{Z_s} \left( 1 - \exp \left[ - \frac{Z_s}{A_f} \right] \right), \quad \text{Eq. DR1 (Gosse and Phillips, 2001)}$$

where  $Q_s$  = production-rate correction factor for sample thickness

$A_f$  = attenuation length of the cosmic-ray flux (159 g cm<sup>-2</sup>)

$Z_s$  = sample thickness

The effect of snow cover is more difficult to accurately estimate, but can be quantified by using

$$S_{snow} = \frac{1}{12} \sum_{i=1}^{i=12} e^{-([H_{snow,i} - H_{rock}] \rho_{snow,i}) / A_f}, \quad \text{Eq. DR2 (Gosse and Phillips, 2001)}$$

where  $S_{snow}$  = shielding factor for snow cover (applied to the production rate)

$H_{snow} - H_{rock}$  = amount of snow on the boulder surface

$\rho_{snow}$  = density of the snowpack

$i$  = month of the year (1 – 12)

Although this procedure is a useful means of estimating the effect of snow thickness on boulder-exposure ages in the western U.S., it may not be appropriate for moraine boulders at the mouths of the Lake Fork and Yellowstone canyons. Boulders on these two moraines are surrounded by minimal vegetation (and were likely surrounded by less vegetation during colder

time intervals of the past) and are situated locally at topographic high points; this suggests that moraine crests are wind swept of some portion of their snow cover, leaving the tallest boulders exposed above the snow pack. Furthermore, the lateral and terminal moraines sampled in this study are approximately north-south trending and perpendicular to prevailing wind direction (westerly). Snow could be easily removed from moraine crests by wind and deposited on the leeward slope (in this case, the distal slope of the moraine). Further discussion of the possible effects of snow and sediment cover on  $^{10}\text{Be}$  production rates and cosmogenic surface-exposure ages in the Uinta Mountains is available in Laabs (2004).

In summary, we avoid the considerable uncertainty of accounting for possible effects of snow (or sediment cover) on production rate, and consider the inverse-variance weighted-mean of individual boulder-exposure ages from each moraine to represent the time of terminal-moraine abandonment. The robust set of cosmogenic  $^{10}\text{Be}$  surface-exposure ages from the Lake Fork moraines (Fig. 2, Table DR2) provides the chronological framework for the discussion in this paper.

## REFERENCES

- Benson, L., Madole, R., Phillips, W., Landis, G., Thomas, T., and Kubik, P., 2004a, The probable importance of snow and sediment shielding on cosmogenic ages of the north-central Colorado Pinedale and pre-Pinedale moraines: *Quaternary Science Reviews*, vol. 23, p. 193-206.
- Benson, L., Madole, R., Landis, G., and Gosse, J., 2004b, New data for late Pleistocene Pinedale alpine glaciation from southwestern Colorado: *Quaternary Science Reviews*, vol. 24, p. 49-65.

Bierman, P.R., Marsella, K.A., Patterson, C., Davis, P.T., and Caffee, M., 1999, Mid-Pleistocene cosmogenic minimum-age limits for pre-Wisconsinan glacial surfaces in southwestern Minnesota and southern Baffin Island: a multiple nuclide approach, *Geomorphology*, v. 27, p. 25-39.

Bierman, P.R., Caffee, M.W., Davis, P.T., Marsella, K., Pavich, M., Colgan, P., Mickelson, D., Larsen, J., 2003, Rates and timing of Earth-surface processes from *in situ*-produced cosmogenic Be-10, in, Grew, E.S., ed., *Beryllium - Mineralogy, Petrology and Geochemistry*, Reviews in Mineralogy and Geochemistry, v. 50, p. 147-205.

Desilets, D. and Zreda, M., 2001, On scaling cosmogenic nuclide production rates for altitude and latitude using cosmic-ray measurements: *Earth and Planetary Science Letters*, v. 193, p. 197-212.

Douglass, D.C., Singer, B.S., Kaplan, M.R., Ackert, R.P., Mickelson, D.M., and Caffee, M.W., 2005, Evidence of Early Holocene Glacial Advances in Southern South America from Cosmogenic Surface Exposure Dating: *Geology*, v. 33, p. 237-240.

Gosse, J.C., Klein, J., Evenson, E.B., Lawn, B., and Middleton, R., 1995a, Beryllium-10 dating of the duration and retreat of the last Pinedale glacial sequence: *Science*, v. 268, no. 5215, p. 1329-1333.

Gosse, J.C., Evenson, E.B., Klein, J., Lawn, B., and Middleton, R., 1995b, Precise cosmogenic  $^{10}\text{Be}$  measurements in western North America: support for a global Younger Dryas cooling event: *Geology*, v. 23, no. 10, p. 877-880.

Gosse, J.C. and Phillips, F.M., 2001, Terrestrial in situ cosmogenic nuclides; theory and application: *Quaternary Science Reviews*, v. 20, no. 14, p. 1475-1560.

Kaplan, M.R., Singer, B.S., Douglass, D.C., and Kurz, MD., 2004, Cosmogenic nuclide chronology of millennial-scale glacial advances during marine O-isotope stage 2 in Patagonia: *Geological Society of America Bulletin*, v. 116, p. 308-321.

Kohl, C.P., and Nishiizumi, K., 1992, Chemical isolation of quartz for measurement of in-situ-produced cosmogenic nuclides: *Geochemica et Cosmochemica Acta*, v. 56, p. 3583-3587.

Laabs, B.J.C., 2004, Late Quaternary glacial and paleoclimate history of the southern Uinta Mountains, Utah [Ph.D. thesis]: Madison, University of Wisconsin, 162 p.

Lal, D., 1991, Cosmic ray labeling of erosion surfaces: In-situ nuclide production rates and erosion models: *Earth and Planetary Science Letters*, v. 104, p. 424-439.

Licciardi, J.M., Clark, P.U., Brook, E.J., Elmore, D., and Sharma, P., 2004, Variable response of western U.S. glaciers during the last deglaciation: *Geology*, v. 32, p. 81-84.



Licciardi, J.M., Clark, P.U., Brook, E.J., Pierce, K.J., Kurz, M.D., Elmore, D., and Sharma, P., 2001, Cosmogenic  $^3\text{He}$  and  $^{10}\text{Be}$  chronologies of the late Pinedale northern Yellowstone ice cap, Montana, USA: *Geology*, v. 29, no. 12, p. 1095-1098.

Middleton, R., Brown, L., Dezfouly-Arjomandy, B., and Klein, J., 1993, On  $^{10}\text{Be}$  standards and the half life of  $^{10}\text{Be}$ : *Nuclear Instruments and Methods in Physics Research*, v. B82, p. 399-403.

Sharma, P., Bourgeois, M., Elmore, D., Granger, D., Lipschultz, M.E., Ma, X., Miller, T., Mueller, K., Rickey, F., Simms, P., Vogt, S., 2000, PRIME Lab AMS performance, upgrades, and research applications: *Nuclear Instruments and Methods in Physics Research*, v. B172, p. 112-123.

Stone, J.O., 2000, Air pressure and cosmogenic isotope production: *Journal of Geophysical Research*, B, Solid Earth and Planets, v. 105, no. 10, p. 23,753-23,759.

Table DR1.  $^{10}\text{Be}$  Data and Boulder-Exposure Ages on the Yellowstone Canyon Moraine. Munroe et al., *Geology*

| Sample | Lithology <sup>*</sup> | Elevation<br>(m asl) | Latitude<br>(°N) | Longitude<br>(°W) | Boulder<br>height<br>(m) | $^9\text{Be}$ spike<br>added<br>( $\mu\text{g}$ ) | $^{10}\text{Be}/^9\text{Be}$<br>( $10^{-15}$ ) | $2\sigma$<br>error | $^{10}\text{Be} \pm 2\sigma$<br>( $10^4$ atoms<br>$\text{g SiO}_2^{-1}$ ) | Sample<br>thickness<br>(cm) | Scaling<br>factor <sup>†</sup> | Age $\pm$<br>$2\sigma^{\S}$<br>(ka) |
|--------|------------------------|----------------------|------------------|-------------------|--------------------------|---------------------------------------------------|------------------------------------------------|--------------------|---------------------------------------------------------------------------|-----------------------------|--------------------------------|-------------------------------------|
| YS-11  | qtzite                 | 2512                 | 40.5208          | 110.3271          | 0.35                     | 512                                               | 349.98                                         | 20                 | $35.0 \pm 2.8$                                                            | 9.0                         | 6.17                           | $12.0 \pm 1.0^{**}$                 |
| YS-6   | wm ss                  | 2540                 | 40.5291          | 110.3262          | 0.50                     | 510                                               | 459.42                                         | 26                 | $40.0 \pm 3.2$                                                            | 2.5                         | 6.28                           | $13.3 \pm 1.1^{**}$                 |
| YS-7   | qtzite                 | 2531                 | 40.5282          | 110.3262          | 0.55                     | 510                                               | 491.34                                         | 28                 | $46.1 \pm 3.8$                                                            | 2.5                         | 6.24                           | $15.1 \pm 1.3^{**}$                 |
| YS-9   | qtzite                 | 2514                 | 40.5207          | 110.3272          | 1.00                     | 511                                               | 557.46                                         | 34                 | $53.6 \pm 4.6$                                                            | 2.5                         | 6.17                           | $17.4 \pm 1.5$                      |
| YS-3   | wm ss                  | 2561                 | 40.5324          | 110.3256          | 1.20                     | 503                                               | 582.54                                         | 40                 | $55.3 \pm 5.0$                                                            | 2.5                         | 6.36                           | $17.4 \pm 1.6$                      |
| YS-10  | wm ss                  | 2554                 | 40.5317          | 110.3258          | 0.65                     | 509                                               | 639.54                                         | 38                 | $56.3 \pm 4.6$                                                            | 2.5                         | 6.33                           | $17.9 \pm 1.5$                      |
| YS-8   | wm ss                  | 2517                 | 40.5223          | 110.3270          | 0.80                     | 512                                               | 665.76                                         | 32                 | $58.6 \pm 4.5$                                                            | 2.5                         | 6.19                           | $19.0 \pm 1.5$                      |

weighted mean ( $n = 7$ ; 95% confidence) =  $15.2 \pm 2.6$ MSWD ( $n = 7$ ) = 18<sup>\*</sup>wm ss = weakly metamorphosed sandstone, qtzite = orthoquartzite.<sup>†</sup>Computed using equations in Stone (2000).<sup>§</sup>Ages are corrected for sample thickness. Analytical uncertainty is reported.

Table DR2.  $^{10}\text{Be}$  Data and Boulder-Exposure Ages on the Lake Fork Moraines. Munroe et al., *Geology*

| Moraine*                                           | Sample† | Elevation<br>(m asl) | Latitude<br>(°N) | Longitude<br>(°W) | Boulder<br>height<br>(m) | $^9\text{Be}$ spike<br>added<br>( $\mu\text{g}$ ) | $^{10}\text{Be}/^9\text{Be}$<br>( $10^{-15}$ ) | $2\sigma$<br>error | $^{10}\text{Be} \pm 2\sigma$<br>( $10^4$ atoms<br>$\text{g SiO}_2^{-1}$ ) | Sample<br>thickness<br>(cm) | Scaling<br>factor <sup>§</sup> | Age $\pm$<br>$2\sigma^{\#}$<br>(ka) |
|----------------------------------------------------|---------|----------------------|------------------|-------------------|--------------------------|---------------------------------------------------|------------------------------------------------|--------------------|---------------------------------------------------------------------------|-----------------------------|--------------------------------|-------------------------------------|
| LF1                                                | LF04-3  | 2543                 | 40.5144          | 110.4584          | 0.35                     | 506                                               | 520                                            | 42                 | $34.0 \pm 3.4$                                                            | 3.0                         | 6.29                           | $11.5 \pm 1.2^{**}$                 |
| LF1                                                | LF04-1  | 2561                 | 40.5166          | 110.4615          | 0.64                     | 505                                               | 702                                            | 48                 | $51.6 \pm 4.6$                                                            | 5.0                         | 6.36                           | $16.7 \pm 1.5$                      |
| LF1                                                | LF04-2  | 2560                 | 40.5176          | 110.4627          | 1.20                     | 505                                               | 785                                            | 46                 | $53.7 \pm 4.6$                                                            | 6.0                         | 6.36                           | $17.7 \pm 1.5$                      |
| LF1                                                | LF04-5B | 2553                 | 40.5190          | 110.4623          | 0.56                     | 506                                               | 621                                            | 42                 | $55.4 \pm 8.2$                                                            | 4.0                         | 6.33                           | $17.8 \pm 1.6$                      |
| LF1                                                | LF04-5A | 2553                 | 40.5190          | 110.4623          | 0.48                     | 505                                               | 642                                            | 40                 | $55.4 \pm 7.6$                                                            | 8.0                         | 6.33                           | $18.4 \pm 1.6$                      |
| LF1                                                | LFRK-5  | 2551                 | 40.5172          | 110.4603          | 0.50                     | 512                                               | 547                                            | 60                 | $60.3 \pm 7.4$                                                            | 2.5                         | 6.32                           | $19.2 \pm 2.4$                      |
| LF1                                                | LF04-4  | 2555                 | 40.5181          | 110.4608          | 0.47                     | 507                                               | 636                                            | 52                 | $60.4 \pm 10.6$                                                           | 7.0                         | 6.34                           | $19.9 \pm 2.0$                      |
| weighted mean (n = 6; 95% confidence; MSWD = 1.6)  |         |                      |                  |                   |                          |                                                   |                                                |                    |                                                                           |                             |                                | $18.0 \pm 1.1$                      |
| LF2                                                | LFR-6   | 2438                 | 40.5098          | 110.4509          | 0.61                     | 504                                               | 589                                            | 52                 | $47.0 \pm 5.0$                                                            | 7.0                         | 5.88                           | $16.1 \pm 1.5$                      |
| LF2                                                | LFR-9   | 2499                 | 40.5167          | 110.4572          | 0.65                     | 505                                               | 641                                            | 52                 | $50.5 \pm 5.0$                                                            | 2.5                         | 6.11                           | $16.6 \pm 1.4$                      |
| LF2                                                | LFR-4   | 2450                 | 40.5105          | 110.4515          | 0.51                     | 505                                               | 728                                            | 62                 | $48.7 \pm 5.0$                                                            | 2.0                         | 5.92                           | $16.6 \pm 1.5$                      |
| LF2                                                | LFR-7   | 2490                 | 40.5157          | 110.4560          | 0.70                     | 504                                               | 661                                            | 50                 | $50.7 \pm 5.0$                                                            | 2.5                         | 6.08                           | $16.7 \pm 1.4$                      |
| LF2                                                | LFR-5   | 2439                 | 40.5103          | 110.4511          | 0.65                     | 505                                               | 595                                            | 100                | $46.9 \pm 8.4$                                                            | 8.0                         | 5.88                           | $16.7 \pm 2.9$                      |
| LF2                                                | LFR-1   | 2464                 | 40.5131          | 110.4533          | 0.68                     | 506                                               | 622                                            | 40                 | $50.9 \pm 4.4$                                                            | 1.0                         | 5.98                           | $16.9 \pm 1.2$                      |
| LF2                                                | LFR-3   | 2451                 | 40.5112          | 110.4519          | 0.71                     | 506                                               | 698                                            | 70                 | $53.4 \pm 6.2$                                                            | 2.0                         | 5.93                           | $18.0 \pm 1.9$                      |
| weighted mean (n = 7; 95% confidence; MSWD = 0.36) |         |                      |                  |                   |                          |                                                   |                                                |                    |                                                                           |                             |                                | $16.8 \pm 0.7$                      |

Note: weighted-mean age is considered the age of moraine abandonment (see text for explanation).

\*See Figure 1.

†All samples are composed of weakly-metamorphosed sandstone.

§Computed using equations in Stone (2000).

#Ages are corrected for sample thickness. Analytical uncertainty is reported.

\*\*Age is a statistical outlier at  $2\sigma$ .

Table DR3. Equilibrium Line Altitude Calculations. Munroe et al., *Geology*

| Glacier                  | AAR 0.65<br>m | THAR 0.40<br>m | L. Moraine<br>m | Weighted ELA<br>m | Easting<br>km |
|--------------------------|---------------|----------------|-----------------|-------------------|---------------|
| Pinon Canyon             | 2621          | 2610           | 2568            | 2609              | 0.9           |
| Swifts Canyon            | 2682          | 2520           | 2506            | 2599              | 1.8           |
| Bear Basin               | 2524          | 2524           | 2573            | 2532              | 2.9           |
| White Pine               | 2667          | 2570           | 2658            | 2633              | 4.4           |
| South Fork               | 2774          | 2610           | 2463            | 2668              | 6.5           |
| Nobletts Creek           | 2646          | 2680           | 2682            | 2663              | 7.7           |
| Shingle Mill             | 2743          | 2670           | 2699            | 2711              | 8.7           |
| Shingle Mill east        | 2633          | 2700           | 2560            | 2643              | 9.6           |
| Bear Trap north          | 2768          | 2770           | 2682            | 2754              | 9.9           |
| Smith & Morehouse        | 2880          | 2710           | 2963            | 2837              | 12.7          |
| Slader Ridge west        | 2719          | 2700           | 2682            | 2707              | 13.3          |
| Slader Creek             | 2728          | 2770           | 2850            | 2762              | 15.4          |
| Main Weber               | 2972          | 2780           | 2743            | 2870              | 21.5          |
| West Fork Bear           | 2880          | 2788           | 2849            | 2844              | 23.6          |
| Gold Hill                | 2840          | 2888           | 2939            | 2873              | 27.7          |
| Duchesne                 | 3005          | 2719           | 2987            | 2907              | 29.8          |
| Hayden Fork Bear River   | 3025          | 2948           | 3188            | 3027              | 32.3          |
| East Fork Bear           | 3035          | 2988           | 3188            | 3045              | 39.2          |
| Log Hollow               | 3008          | 2904           | 2859            | 2949              | 42.0          |
| Rock Creek               | 3132          | 2733           | 3109            | 2995              | 49.1          |
| Little West Fork Blacks  | 2990          | 2952           | 2970            | 2974              | 49.9          |
| Blacks Fork              | 3020          | 3036           | 3212            | 3057              | 51.9          |
| Lake Fork                | 3170          | 2881           | 2926            | 3033              | 60.5          |
| West Fork Smiths         | 3110          | 3136           | 3120            | 3120              | 61.8          |
| Smiths Fork              | 3045          | 3080           | 3103            | 3066              | 67.7          |
| Yellowstone              | 3185          | 2811           | 3094            | 3045              | 73.7          |
| Henrys Fork              | 3130          | 3112           | 3280            | 3149              | 73.7          |
| West Fork Beaver Creek   | 3230          | 3156           | 3212            | 3202              | 79.4          |
| Crow Canyon              | 3078          | 3075           | 2987            | 3062              | 80.0          |
| Heller Lake              | 3011          | 3019           | 3011            | 3014              | 83.2          |
| Middle Fork Beaver Creek | 3210          | 3168           | 3225            | 3199              | 84.0          |
| Thompson Creek           | 3125          | 3084           | 3139            | 3114              | 90.5          |
| Uinta                    | 3286          | 2853           | 3018            | 3097              | 91.3          |
| Burnt Fork               | 3210          | 3048           | 3160            | 3148              | 94.9          |
| Upper Rock Lake          | 3089          | 2980           | 3078            | 3051              | 99.5          |
| Middle Fork Sheep Creek* | 3130          | 3128           | 3055            | 3117              | 102.4         |
| Whiterocks               | 3267          | 2755           | 3170            | 3080              | 104.6         |
| South Fork Sheep Creek*  | 3170          | 3068           | 3080            | 3121              | 107.1         |
| West Fork Carter Creek*  | 3140          | 3068           | 3130            | 3114              | 111.3         |
| Dry Fork                 | 3093          | 2897           | 3158            | 3039              | 114.8         |
| East Fork Carter Creek*  | 3060          | 3048           | 3121            | 3066              | 115.3         |
| North Fork Ashley        | 3160          | 3136           | 3078            | 3138              | 119.6         |
| Chimney Rock Lake        | 3097          | 3116           | 3121            | 3107              | 120.9         |
| South Fork Ashley*       | 3100          | 3040           | 3150            | 3088              | 122.9         |
| Mean                     | 2986          | 2892           | 2962            | 2951              |               |

\* Piedmont glacier, AAR of 0.50
